# Supplementary material
Source: Research Square preprint supplement (doi:10.21203/rs.3.rs-9699160/v1)
Supplement: Supplementary file 1 [file 166b762d76538f06216818e2.docx]

**Additional File 6: GRIPP 2 Short Form**

| **Section** | **Description of section** | **Answers** |
| --- | --- | --- |
| Aim | Report the aim of PPI in the study | The aim of PPI was to ensure a patient perspective informed the study questions, design, conduct, and reporting. |
| Methods | Provide a clear description of the methods used for PPIE in the study | The method used of PPI was to have a patient, who could also draw on other areas of relevant expertise, lead the entire project from start to finish. The patient served as both the investigator and the author. |
| Study results | Outcomes – Report the results of PPI in the study, including both positive and negative outcomes | The project would not have started nor been completed without leadership from the patient. The positive outcomes included having the project guided by a patient’s perspective and priorities. The patient also drew on perspectives from other patients, particularly before the project began, to help gain a broader understanding of the potential importance and value of the project to patient communities interested in patient authorship. The negative outcomes included the personal time and costs incurred in planning, conducting, and reporting this study. No external funds were used, which meant all costs were paid for by the patient. |
| Discussion and conclusions | Outcomes – Comment on the extent to which PPI influenced the study overall. Describe positive and negative effects | As a patient-led research project and a patient-authored publication, a patient perspective was the primary influence on the study. A positive effect was that, similar to other patient authors, the patient author brought other areas of expertise to the project (eg, research skills, publication professional skills, peer reviewer skills). These complementary competencies also contributed to the success of the study. The ability to discuss key elements of the project with members of the public in a confidential and respectful environment (the Bellagio Residency sabbatical) was also a major positive for the study. The negative effects included the requirement to dedicate considerable personal unpaid time for a prolonged duration (2 years) to plan, conduct, and report the study. |
| Reflections / critical perspective | Comment critically on the study, reflecting on the things that went well and those that didn’t, so others can learn from this experience | Being able to bring the patient perspective from the outset to the project was key. In terms of ‘nothing about us, without us’, it was critical that a patient perspective was the primary perspective throughout the study. For the future, it would help patient-led research and patient authorship if more funds were available to support associated costs. Future research would also benefit from the development of methods to study patient authorship. Artificial intelligence has been used, but it is not freely available for all. |
