# Supplementary material
Source: Research Square preprint supplement (doi:10.21203/rs.3.rs-9699160/v1)
Supplement: Supplementary file 2 [file 5e7bcc2f56dbb563952efe4c.docx]

### Scoping Review Search strategy

- Created and tested by University of Queensland Information Search Specialist
- Included in Scoping Review Protocol – registered and available at:

Open Science Framework (https://doi.org/10.17605/OSF.IO/BGK24)

**PubMed**

("patient author"[tiab] OR "patient authors"[tiab] OR "patient authorship"[tiab] OR "patients authoring"[tiab] OR "patients as author*"[tiab] OR "authored by patients"[tiab] OR "patient author"[Affiliation] OR "patient partner"[Affiliation] OR "caregiver author*"[Affiliation] OR "carer author*"[tiab] OR "patient involvement"[tiab] OR "patient and public involvement"[tiab] OR "patient engagement"[tiab])

AND

("medical writing"[tiab] OR "publish"[tiab] OR "publication*"[tiab] OR "medical communication*"[tiab] OR "scientific writing"[tiab] OR "scientific communication*"[tiab] OR "Authorship"[Mesh] OR "Publishing"[Mesh])

**Embase**

('patient author':ti,ab OR 'patient authors':ti,ab OR 'patient authorship':ti,ab OR 'patients authoring':ti,ab OR 'patients as author*':ti,ab OR 'authored by patients':ti,ab OR 'patient author':ff OR 'patient partner':ff OR 'caregiver author*':ff OR 'carer author*':ti,ab OR 'patient involvement':ti,ab OR 'patient and public involvement':ti,ab OR 'patient engagement':ti,ab)

AND

('medical writing':ti,ab OR publish:ti,ab OR publication*:ti,ab OR 'medical communication*':ti,ab OR 'scientific writing':ti,ab OR 'scientific communication*':ti,ab OR Publishing/exp)

AND [embase]/lim
