# Supplementary material
Source: Research Square preprint supplement (doi:10.21203/rs.3.rs-9699160/v1)
Supplement: Supplementary file 3 [file 47981ffc73bf70e7cabeb8cc.xlsx]

## Sheet: Data
First Author Last name	All authors	Title	DOI	Year	Journal	Publisher	JIF 2023	Publication type	Source	Open Access	Language	PLS OA	GRIPP2	Research method	Therapeutic Area	Total # authors	# Pt Authors	% Pt Authors	Patient Author	How identified	Affiliation tag	Country first author	Country patient author	Funder	Evidence gaps identified	Evidence gap description	Key quote	Pub Planning	Ethics	Effectiveness	Pub Generation	Ethics	Effectiveness	Pub Sharing	Ethics	Effectiveness	Pub Evaluation	Ethics	Effectiveness

## Sheet: Plan
First Author Last name	Ethics	Effectiveness

## Sheet: Generate
First Author Last name	Ethics	Effectiveness

## Sheet: Share
First Author Last name	Ethics	Effectiveness

## Sheet: Evaluate
First Author Last name	Ethics	Effectiveness

## Sheet: Drop down menu
Source	Open Access	Language	PLS OA	GRIPP2	Research	Therapeutic Area	Patient Author	How identified	Affiliation tag	Country first author	Country patient author	Funder	Pub Planning	Pub Generation	Pub Sharing	Pub Evaluation	Evidence gaps identified
