# Supplementary material
Source: Research Square preprint supplement (doi:10.21203/rs.3.rs-9699160/v1)
Supplement: Supplementary file 4 [file 4cad1fa2b756bf9791da8cf0.xlsx]

## Sheet: Coding
First author	Year	Title	Evidence gap (single)	Initial code	Themes	Secondary code (Lifecycle stage)	Additional notes/memos

## Sheet: Codebook
Dropdown options for Initial code & Theme (edit as needed)

## Sheet: Code for Themes
Codes for themes

## Sheet: Lifecycle
Lifecycle stages for Secondary code

## Sheet: Instructions
How to use this template

## Sheet: CrossTab
Lifecycle × Theme cross-tab
Lifecycle ↓ / Theme →	Raising awareness about patient authorship	Demonstrating value of patient authorship/metrics	Compliance concerns about patient authorship	Methods for studying patient authorship	Identifying patient author candidates	Operational processes/best practices	Relationships (power)	Training			QA: CrossTab grand total
